# Supplementary material
Source: PubMed Central journal article supplement (PMC6683636)
Supplement: Supplemental_Material2.pdf [file Supplemental_Material2.pdf]

## SUPPLEMENTAL MATERIAL

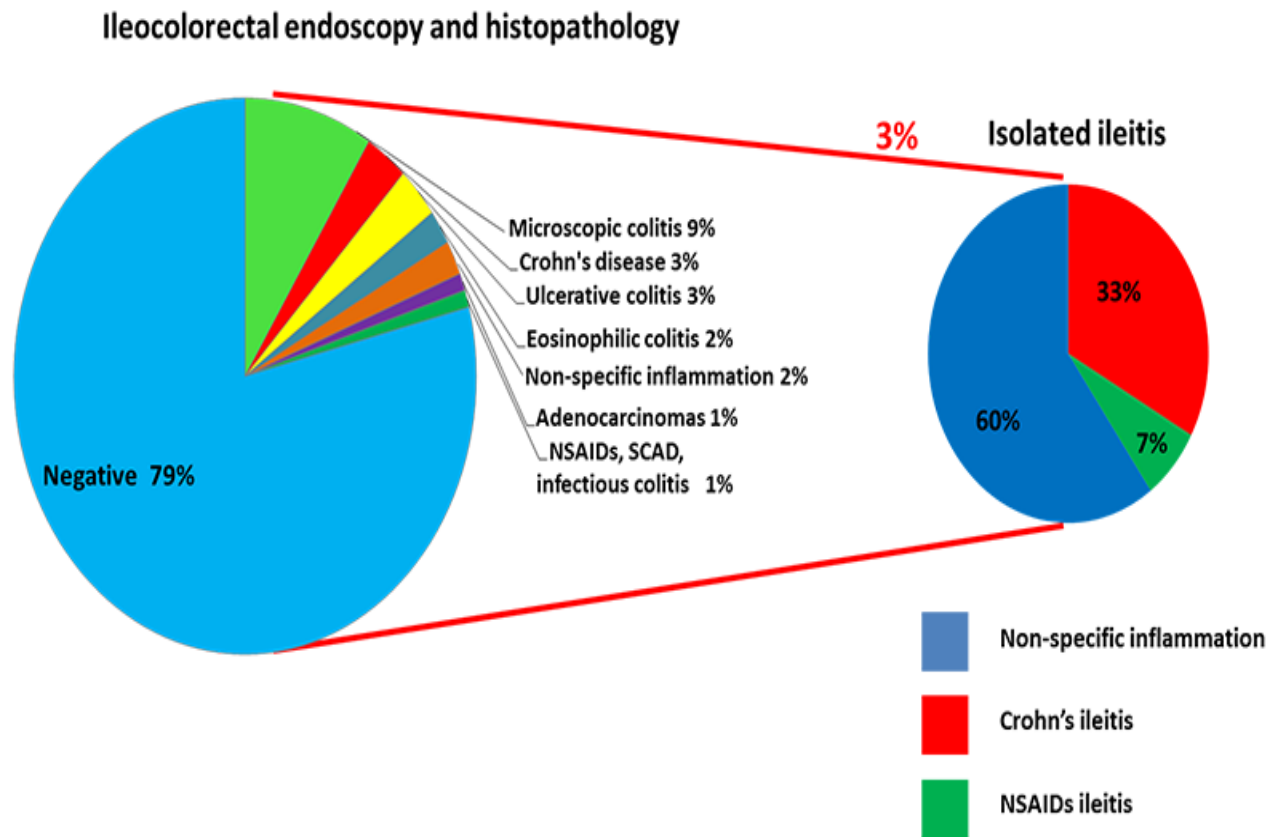

**Figure 1:** Diagnostic definition based on ileocolorectal endoscopy and histo-pathology in patients with chronic non-bloody diarrhea of unknown origin. LNH, lymphoid nodular hyperplasia; NSAIDs, Non-Steroidal Anti-Inflammatory Drugs.

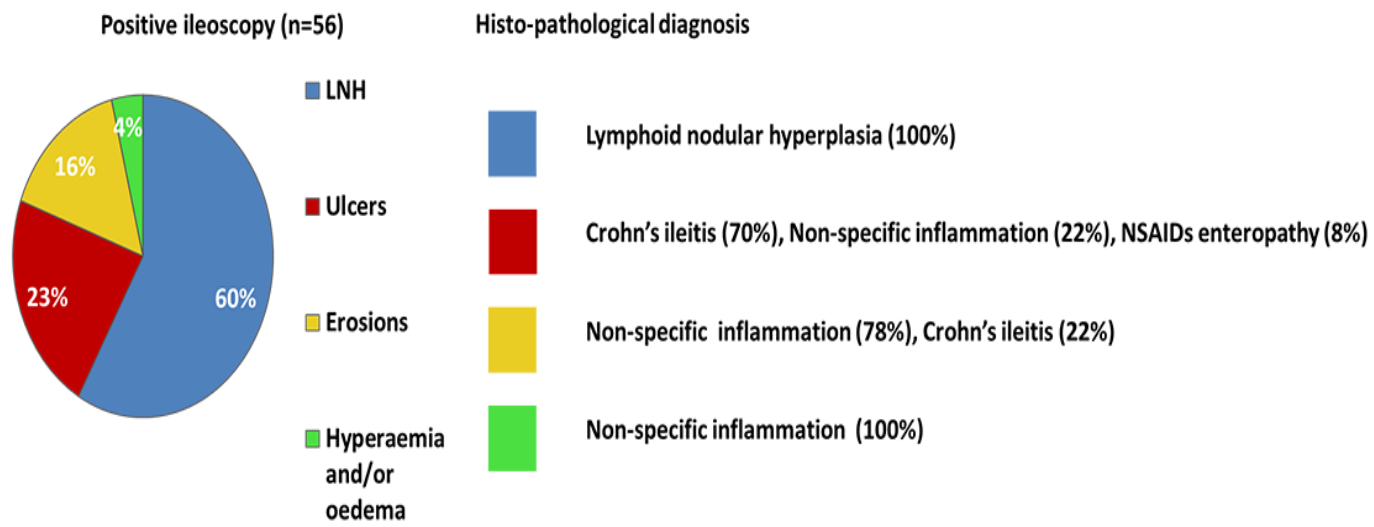

**Figure 2.** Terminal ileum endoscopic and histo-pathological assessment in patients with chronic non-bloody diarrhea of unknown origin. LNH, lymphoid nodular hyperplasia; NSAIDs, Non-Steroidal Anti-Inflammatory Drugs.
